# Supplementary material for: Interaction of a naphthalene based fluorescent probe with Al3+: experimental and computational studies
Source: Royal Society of Chemistry journal article supplement (doi:10.1039/c2ay25825k), 2012-01-01
Supplement: c2ay25825k.pdf [file c2ay25825k.pdf]

## Supporting Information (ESI)†

### Interaction of a naphthalene based fluorescent probe with Al<sup>3+</sup>: Experimental and computational studies.

Sudipta Das, Debasis Karak, Sisir Lohar, Arnab Banerjee, Animesh Sahana and Debasis Das\*

Department of Chemistry, The University of Burdwan, Burdwan, West Bengal, India

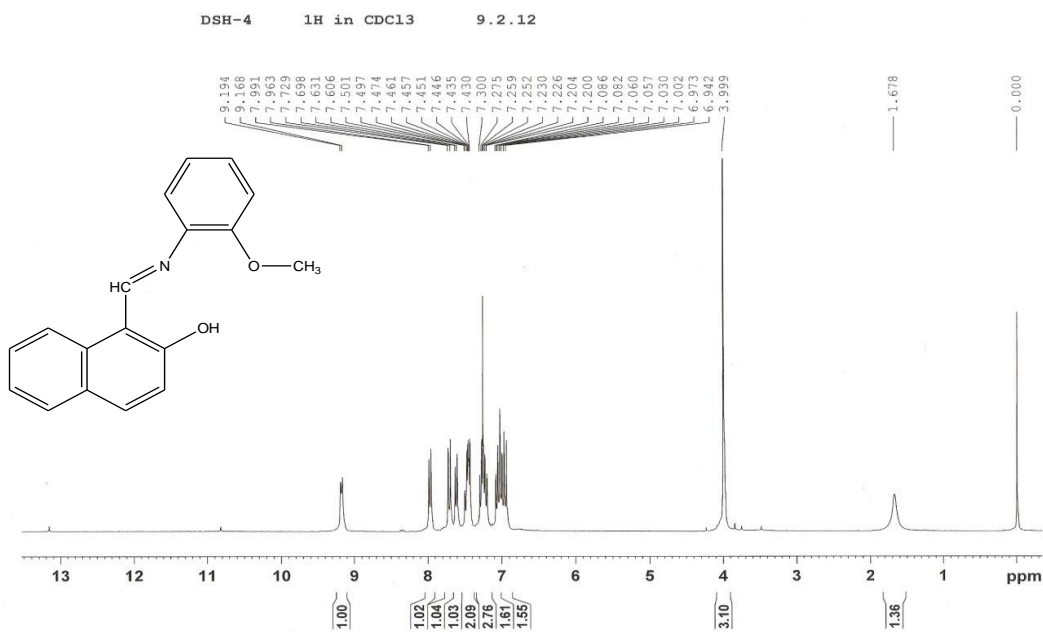

Fig. S1(a). <sup>1</sup>H NMR spectrum of L in CDCl<sub>3</sub>

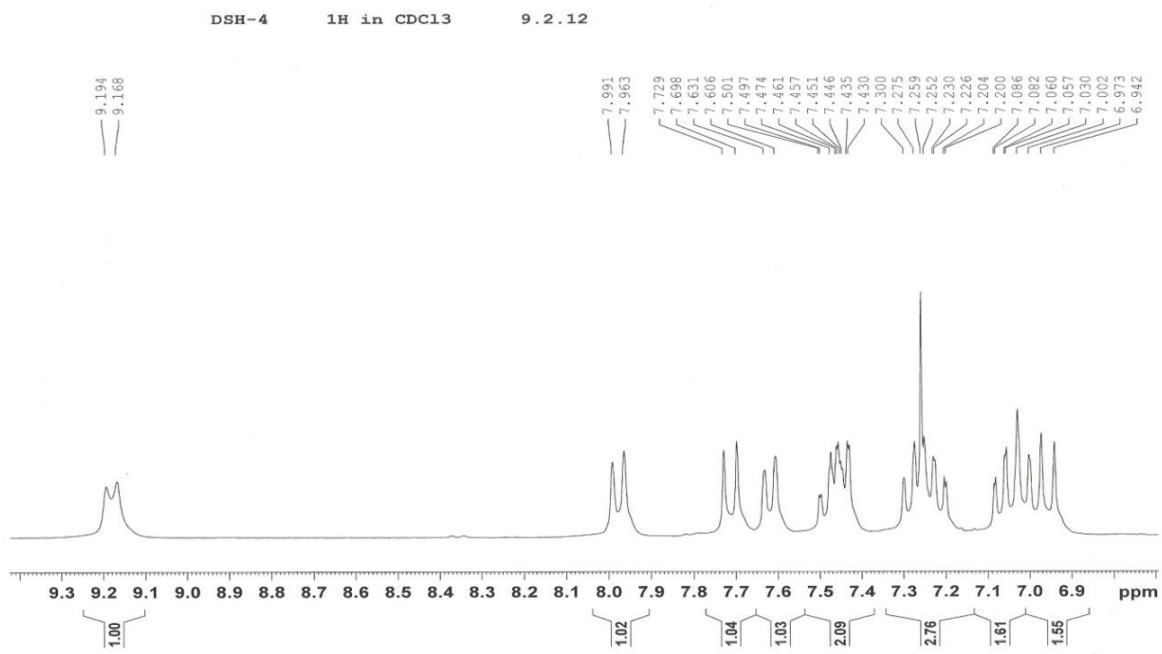

**Fig. S1(b).**  $^1\text{H}$  NMR spectrum (expanded to aromatic region) of **L** in  $\text{CDCl}_3$

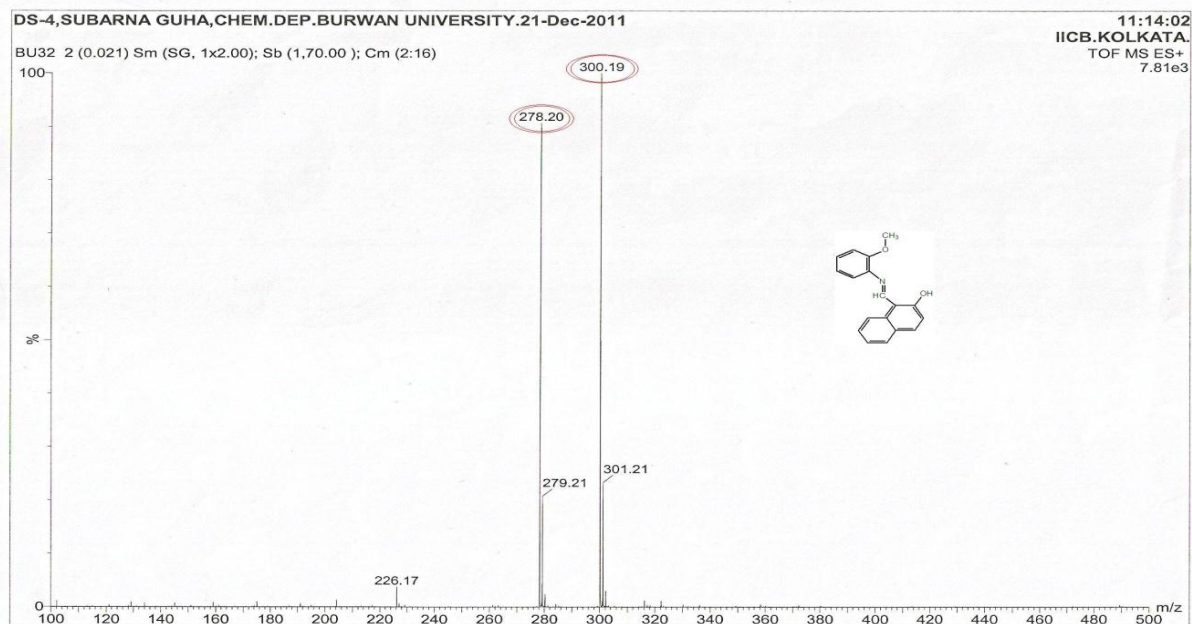

**Fig.S2.** Mass spectra of **L** [ $m/z$   $[\text{M}+\text{H}]^+ = 278.20$  (92%);  $[\text{M}+\text{Na}]^+ = 300.19$  (100%)]

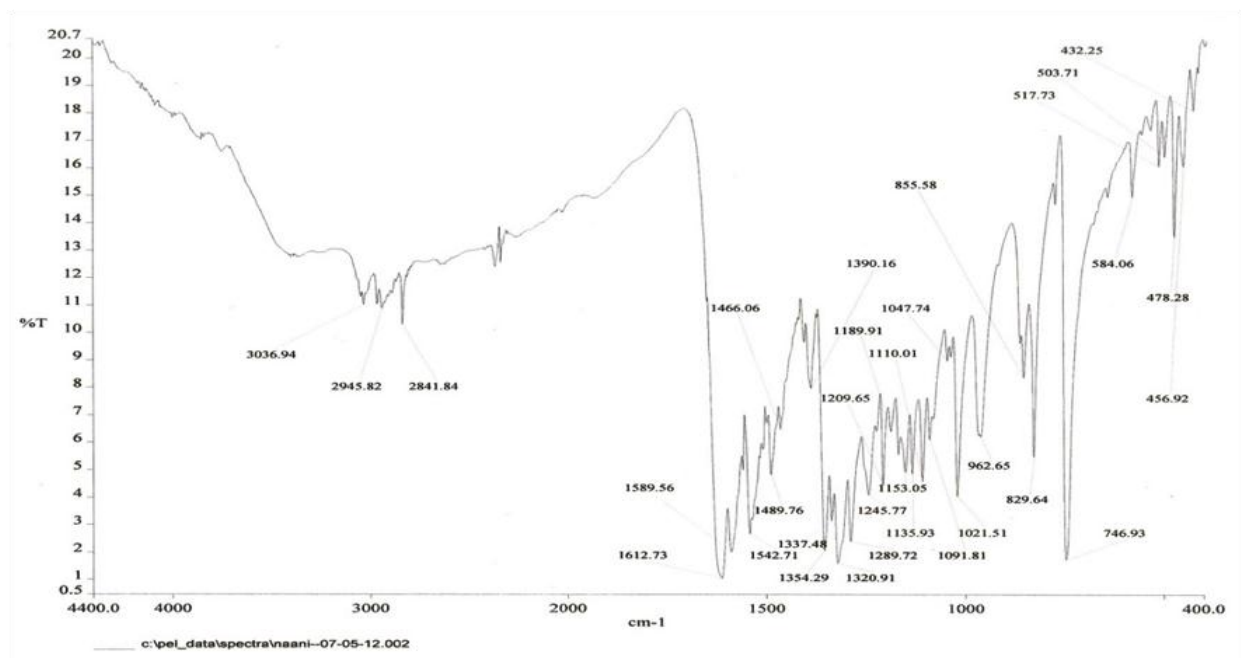

**Fig.S3.** FTIR spectrum of L

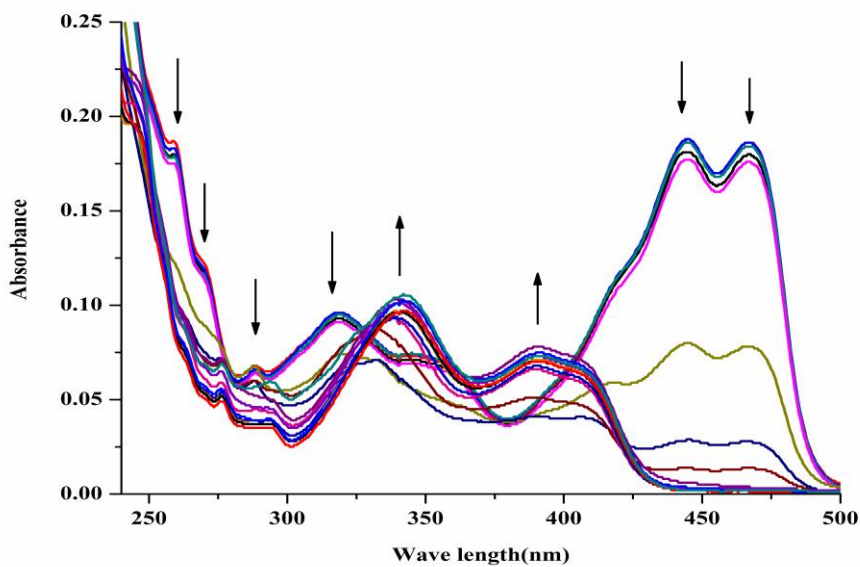

**Fig . S4.** UV-Vis spectral changes of L (10 μ M in HEPES buffer, 0.1 M, pH 7.4) with gradual addition of 0.5 to 10 times of [Al<sup>3+</sup>] (from top to bottom). Two new peaks developed at 392 nm and 340 nm, indicate binding of Al<sup>3+</sup> by the L.

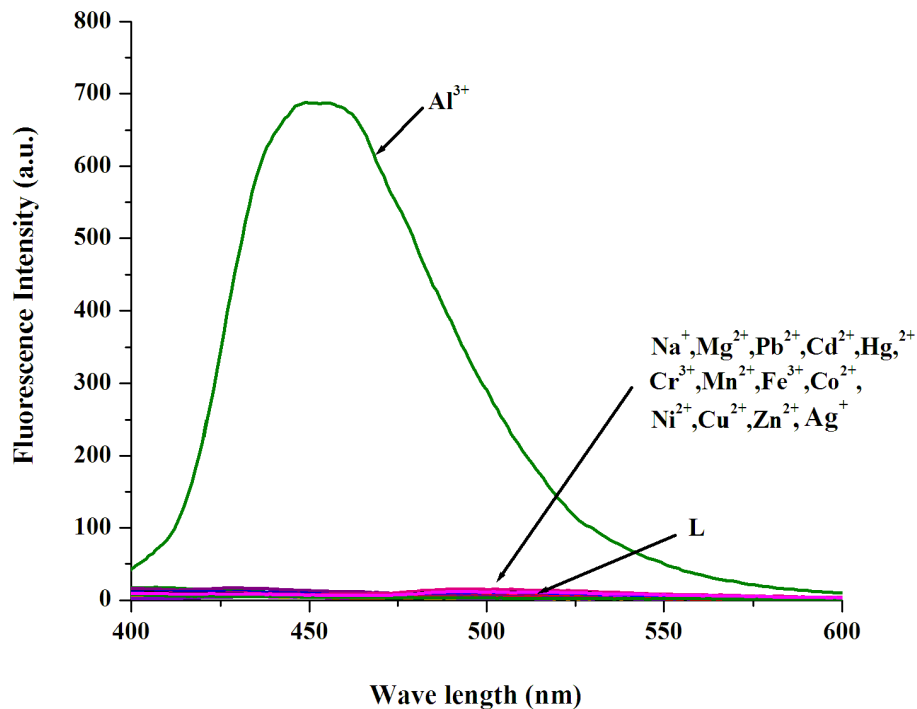

**Fig. S5.** Fluorescence spectra of **L** (10  $\mu\text{M}$ ), **L** +  $\text{Al}^{3+}$  (80  $\mu\text{M}$ ) and **L** (10  $\mu\text{M}$ ) +  $\text{M}^{n+}$  (300  $\mu\text{M}$ ), where  $\text{M}^{n+}$  =  $\text{Na}^+$ ,  $\text{Mg}^{2+}$ ,  $\text{Cr}^{3+}$ ,  $\text{Mn}^{2+}$ ,  $\text{Fe}^{3+}$ ,  $\text{Co}^{2+}$ ,  $\text{Ni}^{2+}$ ,  $\text{Cu}^{2+}$ ,  $\text{Zn}^{2+}$ ,  $\text{Hg}^{2+}$ ,  $\text{Pb}^{2+}$ ,  $\text{Cd}^{2+}$ ,  $\text{Ag}^+$  ( $\lambda_{\text{em}}$ : 449 nm,  $\lambda_{\text{ex}}$ : 345 nm).

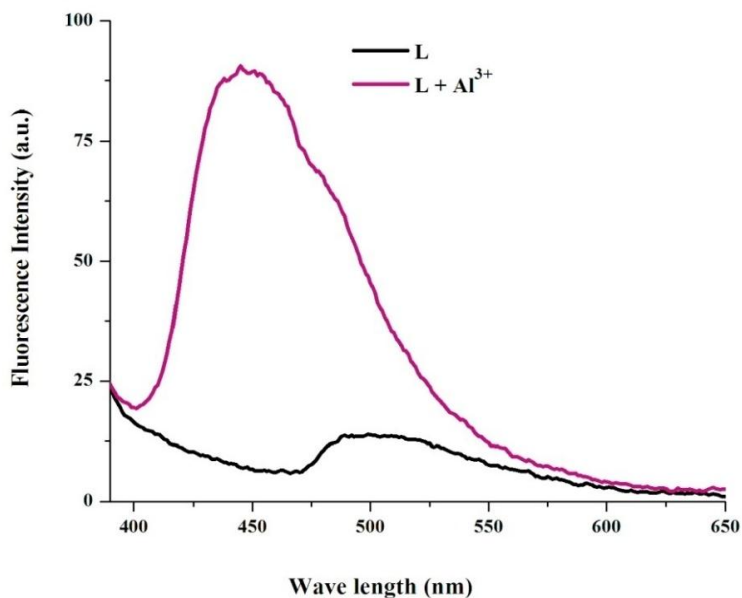

**Fig.S6.** Fluorescence spectra of **L** and its  $\text{Al}^{3+}$  complex ( $\lambda_{\text{ex}}$  = 345 nm,  $\lambda_{\text{em}}$  = 449 nm).

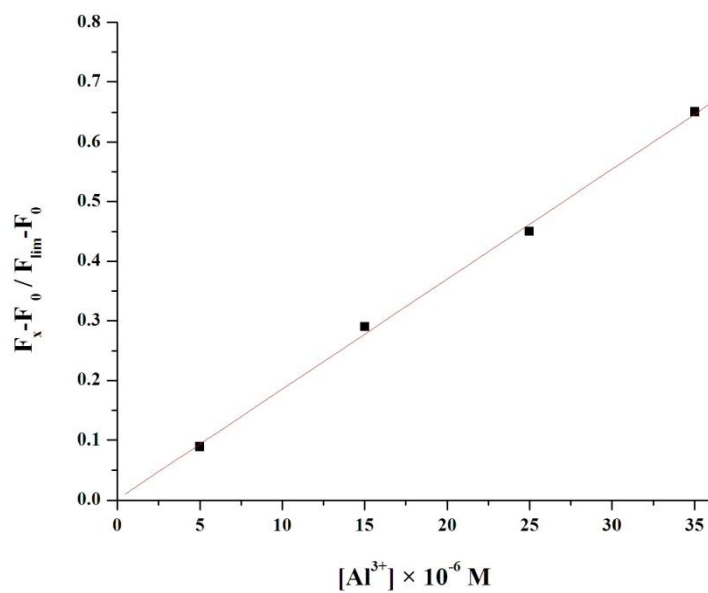

**Fig. S7.** Emission intensities of **L** (10  $\mu\text{M}$ ) as a function of externally added  $[\text{Al}^{3+}]$  in aqueous – methanol ( $\lambda_{\text{em}}$ : 449 nm,  $\lambda_{\text{ex}}$ : 345 nm). The detection limit is  $4.8 \times 10^{-7}\text{M}$ .

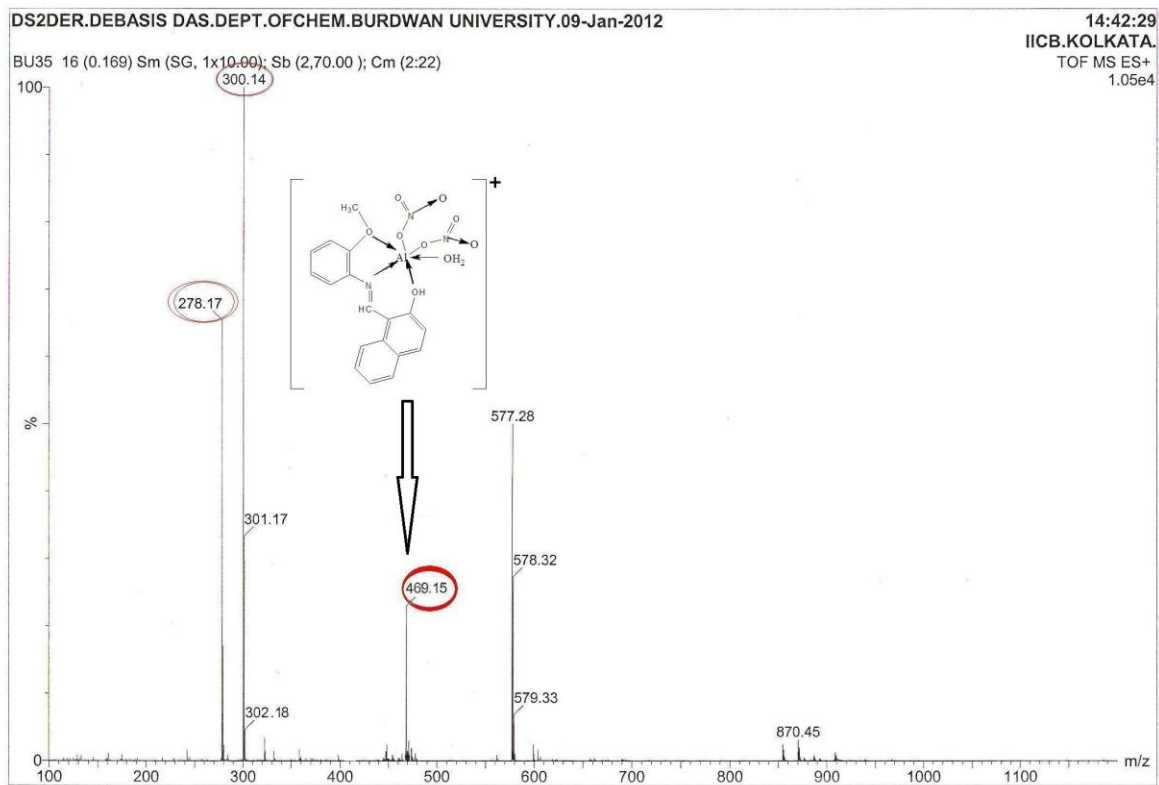

**Fig .S8.** Mass spectra of  $[(L) Al (NO_3)_2(H_2O)]$  complex

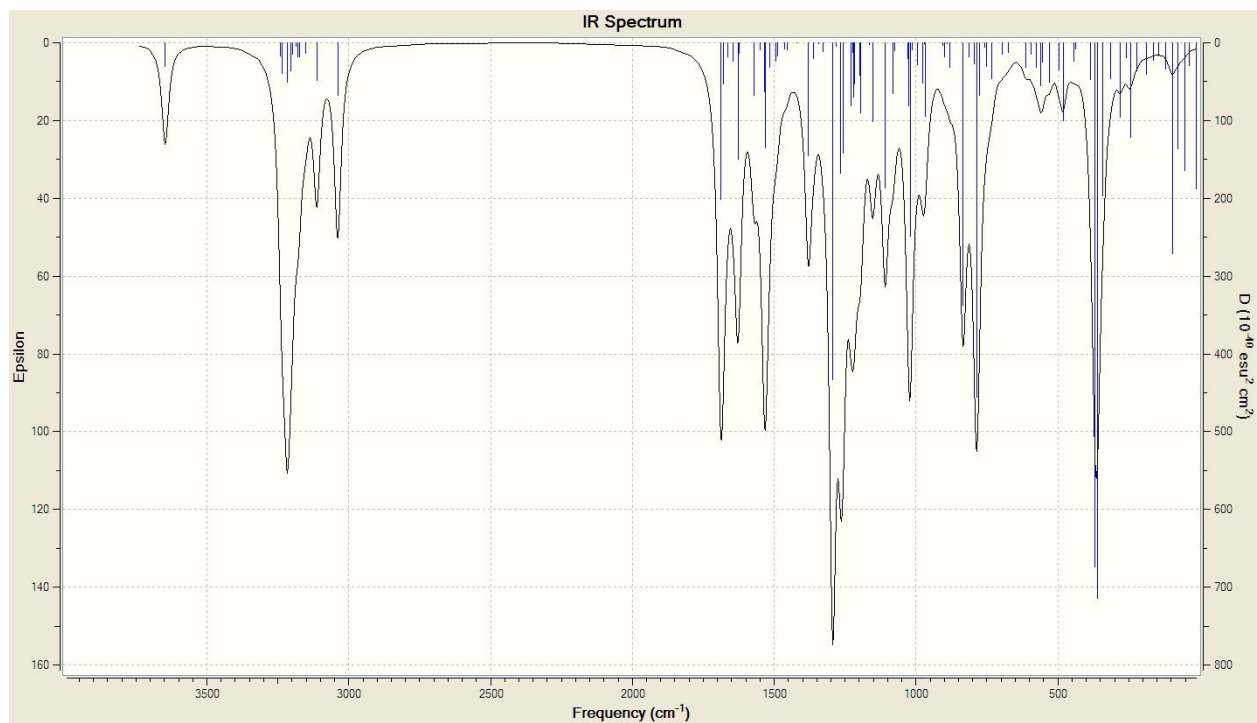

Fig. S9. Theoretical IR spectrum of L.

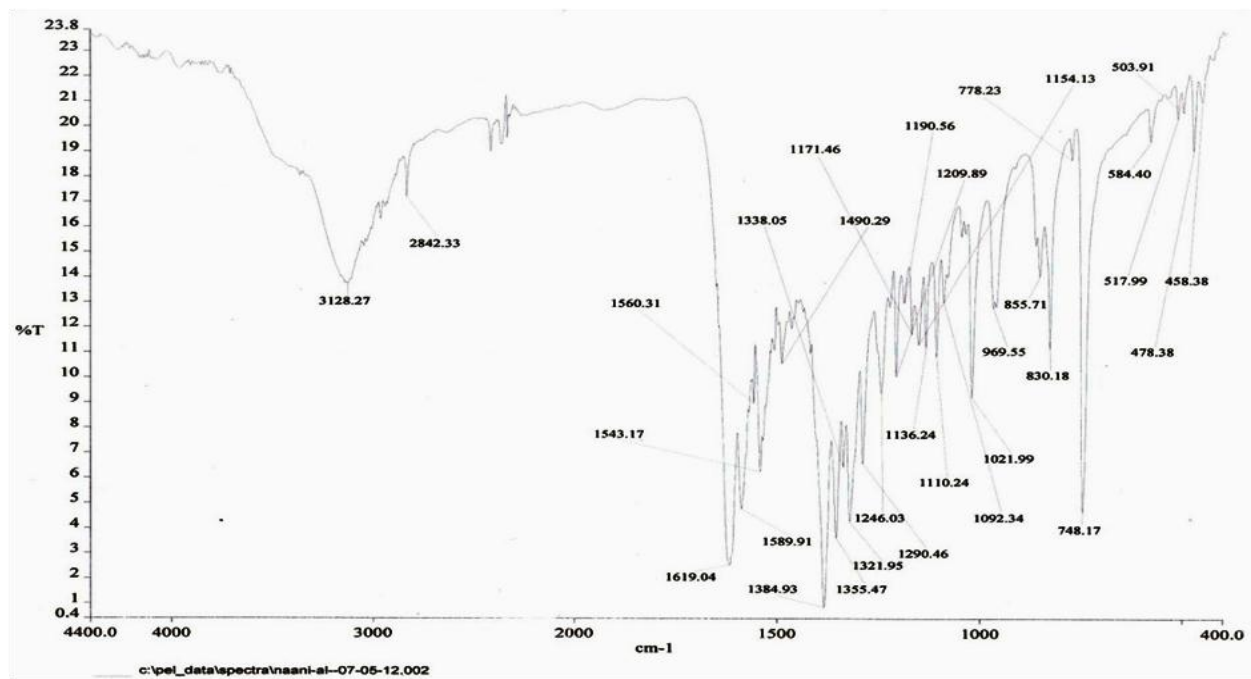

Fig.S10. Experimental IR spectrum of L-Al<sup>3+</sup> complex

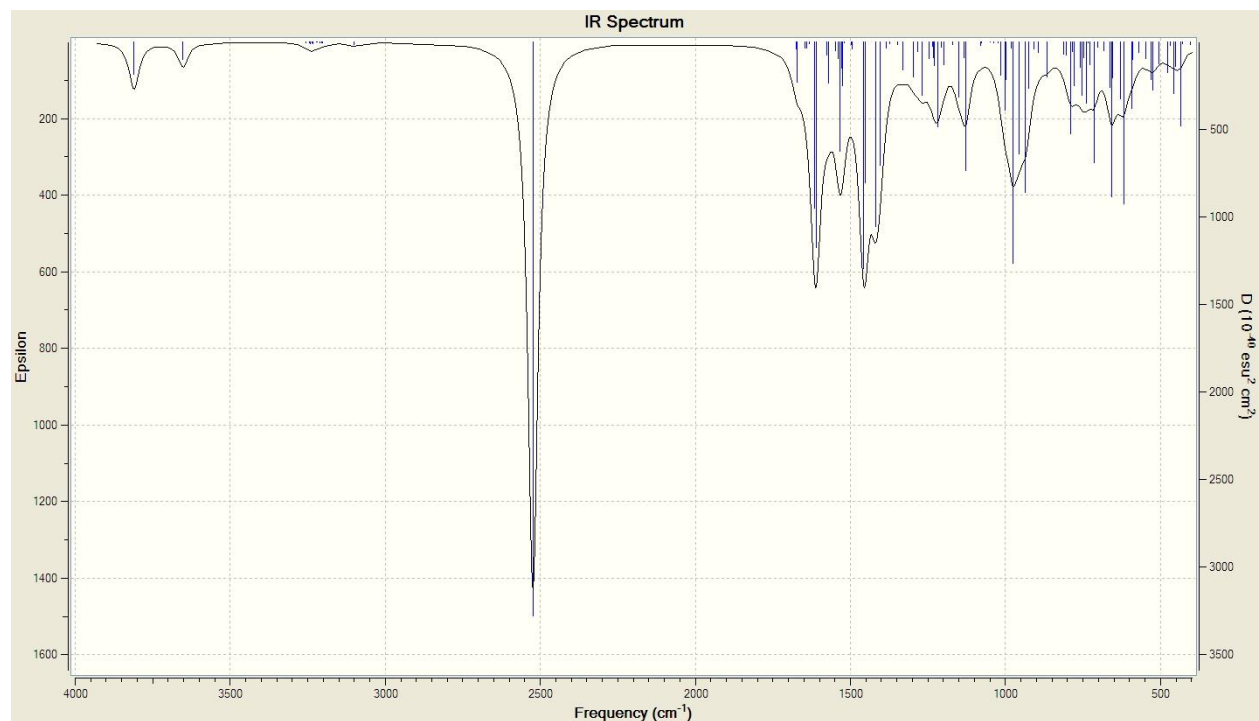

**Fig.S11.** Theoretical IR spectrum of L-Al<sup>3+</sup> complex

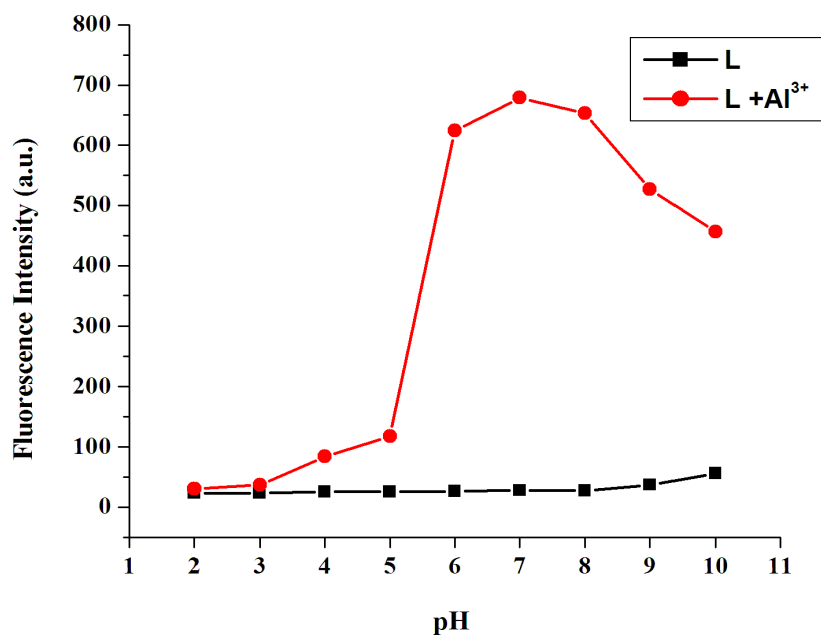

**Fig.S12.** Effect of pH on the binding efficiency of L (10 μM) towards Al<sup>3+</sup> (62 × 10<sup>-6</sup> M) in HEPES buffer, 0.1 M, water: methanol = 2:8, v/v) (λ<sub>em</sub>: 449 nm, λ<sub>ex</sub>: 345 nm).



**Table S1:** Relevant bond lengths and angles of the  $L-Al^{3+}$  complex (atom numbering refers to Fig. 7 (a) and (b) using the 6-31G basis set.

| Bond angle/ $^{\circ}$      | Bond angle/ $^{\circ}$      | Bond length/ $\text{\AA}$                           |
|-----------------------------|-----------------------------|-----------------------------------------------------|
| O (14)-Al (19)-N (3) 81.76  | O (47)-Al (19)-O (27) 93.14 | Al (19)-O (14)(-OCH <sub>3</sub> ) 1.96             |
| O (47)-Al (19)-N (3) 86.49  | O (28)-Al (19)-O (27) 77.70 | Al (19)-N (3) (C=N) 1.97                            |
| O (14)-Al (19)-O (28) 96.62 | O (14)-Al (19)-O (23) 84.54 | Al (19)-O (47) (-OH) 1.92                           |
| O (28)-Al (19)-O (47) 95.22 | O (28)-Al (19)-O (23) 83.97 | Al (19)-O (28) (H <sub>2</sub> O) 1.95              |
| O (14)-Al (19)-O (27) 97.14 | O (47)-Al (19)-O (23) 88.79 | Al (19)-O (23) (NO <sub>3</sub> <sup>-</sup> ) 1.94 |
| N (3)-Al (19)-O(27) 101.63  | N (3)-Al (19)-O (23) 96.66  | Al(19)-O(27) (NO <sub>3</sub> <sup>-</sup> ) 1.88   |

**Table: S2.** Natural Population Analysis (NPA) of **L** .

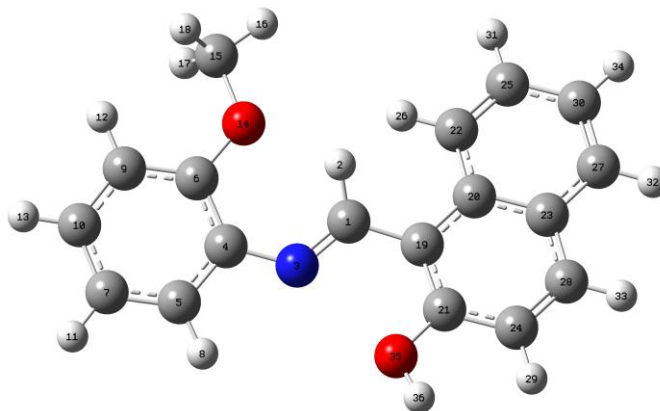

#### Natural Population Analysis

| Atom No | Charge  | Core    | Valence | Rydberg | Total   |
|---------|---------|---------|---------|---------|---------|
| C 1     | 0.07568 | 1.99916 | 3.90775 | 0.01741 | 5.92432 |
| H 2     | 0.21842 | 0.00000 | 0.77798 | 0.00360 | 0.78158 |

|   |    |          |         |         |         |         |
|---|----|----------|---------|---------|---------|---------|
| N | 3  | -0.42090 | 1.99924 | 5.40924 | 0.01242 | 7.42090 |
| C | 4  | 0.08654  | 1.99879 | 3.89747 | 0.01721 | 5.91346 |
| C | 5  | -0.20642 | 1.99897 | 4.19555 | 0.01191 | 6.20642 |
| C | 6  | 0.29303  | 1.99861 | 3.69318 | 0.01518 | 5.70697 |
| C | 7  | -0.26534 | 1.99898 | 4.25514 | 0.01122 | 6.26534 |
| H | 8  | 0.26207  | 0.00000 | 0.73624 | 0.00169 | 0.73793 |
| C | 9  | -0.32196 | 1.99895 | 4.31296 | 0.01004 | 6.32196 |
| C | 10 | -0.22711 | 1.99900 | 4.21648 | 0.01162 | 6.22711 |
| H | 11 | 0.24429  | 0.00000 | 0.75473 | 0.00098 | 0.75571 |
| H | 12 | 0.24341  | 0.00000 | 0.75548 | 0.00112 | 0.75659 |
| H | 13 | 0.24288  | 0.00000 | 0.75609 | 0.00102 | 0.75712 |
| O | 14 | -0.53598 | 1.99972 | 6.53046 | 0.00579 | 8.53598 |
| C | 15 | -0.35352 | 1.99927 | 4.34739 | 0.00686 | 6.35352 |
| H | 16 | 0.24188  | 0.00000 | 0.75738 | 0.00075 | 0.75812 |
| H | 17 | 0.21881  | 0.00000 | 0.77879 | 0.00240 | 0.78119 |
| H | 18 | 0.21665  | 0.00000 | 0.78108 | 0.00227 | 0.78335 |
| C | 19 | -0.11821 | 1.99885 | 4.10613 | 0.01323 | 6.11821 |
| C | 20 | -0.02377 | 1.99894 | 4.01453 | 0.01029 | 6.02377 |
| C | 21 | 0.34475  | 1.99858 | 3.64146 | 0.01520 | 5.65525 |
| C | 22 | -0.22869 | 1.99898 | 4.21937 | 0.01034 | 6.22869 |
| C | 23 | -0.07375 | 1.99892 | 4.06376 | 0.01106 | 6.07375 |
| C | 24 | -0.30426 | 1.99894 | 4.29392 | 0.01140 | 6.30426 |
| C | 25 | -0.23196 | 1.99900 | 4.22144 | 0.01152 | 6.23196 |
| H | 26 | 0.24887  | 0.00000 | 0.74936 | 0.00177 | 0.75113 |
| C | 27 | -0.20935 | 1.99897 | 4.19971 | 0.01067 | 6.20935 |
| C | 28 | -0.19112 | 1.99896 | 4.18133 | 0.01083 | 6.19112 |
| H | 29 | 0.23837  | 0.00000 | 0.76030 | 0.00133 | 0.76163 |
| C | 30 | -0.24954 | 1.99899 | 4.23895 | 0.01161 | 6.24954 |
| H | 31 | 0.24247  | 0.00000 | 0.75650 | 0.00103 | 0.75753 |
| H | 32 | 0.23971  | 0.00000 | 0.75900 | 0.00129 | 0.76029 |
| H | 33 | 0.24443  | 0.00000 | 0.75433 | 0.00124 | 0.75557 |

|   |    |          |         |         |         |         |
|---|----|----------|---------|---------|---------|---------|
| H | 34 | 0.24377  | 0.00000 | 0.75523 | 0.00100 | 0.75623 |
| O | 35 | -0.66738 | 1.99974 | 6.66303 | 0.00462 | 8.66738 |
| H | 36 | 0.48323  | 0.00000 | 0.51498 | 0.00179 | 0.51677 |

---

\* Total \*    0.00000    41.97956    103.75673    0.26371    146.00000

**Table: S3.** Natural Population Analysis (NPA) of  $L-Al^{3+}$  complex

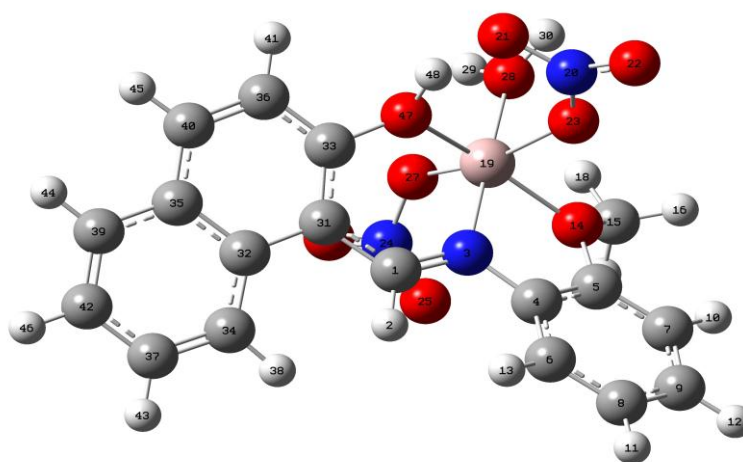

Natural Population

---

| Atom | No | Charge   | Core    | Valence | Rydberg | Total   |
|------|----|----------|---------|---------|---------|---------|
| C    | 1  | 0.17120  | 1.99910 | 3.81373 | 0.01596 | 5.82880 |
| H    | 2  | 0.24291  | 0.00000 | 0.75541 | 0.00167 | 0.75709 |
| N    | 3  | -0.64583 | 1.99930 | 5.63112 | 0.01542 | 7.64583 |
| C    | 4  | 0.10864  | 1.99874 | 3.87774 | 0.01488 | 5.89136 |
| C    | 5  | 0.30963  | 1.99848 | 3.67887 | 0.01301 | 5.69037 |
| C    | 6  | -0.22959 | 1.99894 | 4.22099 | 0.00966 | 6.22959 |
| C    | 7  | -0.27621 | 1.99889 | 4.26704 | 0.01028 | 6.27621 |
| C    | 8  | -0.22227 | 1.99901 | 4.21153 | 0.01172 | 6.22227 |
| C    | 9  | -0.19689 | 1.99902 | 4.18630 | 0.01158 | 6.19689 |

|    |    |          |         |         |         |          |
|----|----|----------|---------|---------|---------|----------|
| H  | 10 | 0.26856  | 0.00000 | 0.73052 | 0.00092 | 0.73144  |
| H  | 11 | 0.27005  | 0.00000 | 0.72910 | 0.00085 | 0.72995  |
| H  | 12 | 0.27059  | 0.00000 | 0.72858 | 0.00083 | 0.72941  |
| H  | 13 | 0.25917  | 0.00000 | 0.73982 | 0.00101 | 0.74083  |
| O  | 14 | -0.62651 | 1.99973 | 6.62117 | 0.00561 | 8.62651  |
| C  | 15 | -0.33299 | 1.99925 | 4.32702 | 0.00672 | 6.33299  |
| H  | 16 | 0.24635  | 0.00000 | 0.75259 | 0.00106 | 0.75365  |
| H  | 17 | 0.25905  | 0.00000 | 0.73953 | 0.00141 | 0.74095  |
| H  | 18 | 0.24815  | 0.00000 | 0.75049 | 0.00136 | 0.75185  |
| Al | 19 | 2.02081  | 9.99741 | 0.96905 | 0.01274 | 10.97919 |
| N  | 20 | 0.69341  | 1.99963 | 4.27960 | 0.02737 | 6.30659  |
| O  | 21 | -0.46943 | 1.99982 | 6.46257 | 0.00704 | 8.46943  |
| O  | 22 | -0.25177 | 1.99979 | 6.24435 | 0.00763 | 8.25177  |
| O  | 23 | -0.65728 | 1.99982 | 6.64963 | 0.00783 | 8.65728  |
| N  | 24 | 0.68135  | 1.99961 | 4.28749 | 0.03154 | 6.31865  |
| O  | 25 | -0.39963 | 1.99982 | 6.39313 | 0.00668 | 8.39963  |
| O  | 26 | -0.30136 | 1.99980 | 6.29417 | 0.00739 | 8.30136  |
| O  | 27 | -0.74290 | 1.99982 | 6.73569 | 0.00739 | 8.74290  |
| O  | 28 | -1.00720 | 1.99981 | 7.00262 | 0.00477 | 9.00720  |
| H  | 29 | 0.57053  | 0.00000 | 0.42779 | 0.00168 | 0.42947  |
| H  | 30 | 0.55969  | 0.00000 | 0.43903 | 0.00129 | 0.44031  |
| C  | 31 | -0.15065 | 1.99882 | 4.14103 | 0.01080 | 6.15065  |
| C  | 32 | -0.00582 | 1.99895 | 3.99642 | 0.01045 | 6.00582  |
| C  | 33 | 0.36445  | 1.99856 | 3.62345 | 0.01355 | 5.63555  |
| C  | 34 | -0.23449 | 1.99897 | 4.22535 | 0.01017 | 6.23449  |
| C  | 35 | -0.06703 | 1.99892 | 4.05724 | 0.01087 | 6.06703  |
| C  | 36 | -0.27971 | 1.99890 | 4.26893 | 0.01189 | 6.27971  |
| C  | 37 | -0.19086 | 1.99901 | 4.18011 | 0.01174 | 6.19086  |
| H  | 38 | 0.24459  | 0.00000 | 0.75421 | 0.00120 | 0.75541  |
| C  | 39 | -0.18871 | 1.99897 | 4.17870 | 0.01104 | 6.18871  |
| C  | 40 | -0.12821 | 1.99898 | 4.11858 | 0.01064 | 6.12821  |

|   |    |          |         |         |         |         |
|---|----|----------|---------|---------|---------|---------|
| H | 41 | 0.27564  | 0.00000 | 0.72336 | 0.00100 | 0.72436 |
| C | 42 | -0.22197 | 1.99899 | 4.21127 | 0.01171 | 6.22197 |
| H | 43 | 0.26454  | 0.00000 | 0.73458 | 0.00089 | 0.73546 |
| H | 44 | 0.25971  | 0.00000 | 0.73917 | 0.00111 | 0.74029 |
| H | 45 | 0.26865  | 0.00000 | 0.73026 | 0.00109 | 0.73135 |
| H | 46 | 0.26672  | 0.00000 | 0.73243 | 0.00085 | 0.73328 |
| O | 47 | -0.84858 | 1.99975 | 6.84459 | 0.00424 | 8.84858 |
| H | 48 | 0.55150  | 0.00000 | 0.44466 | 0.00384 | 0.44850 |

=====

\* Total \*    1.00000    69.97459    159.65103    0.37439    230.00000

**Table.S4.** Theoretical vs. experimental IR data of **L** and [**L**+Al<sup>3+</sup>] complex.

| System                    | Theoretical $\nu/\text{cm}^{-1}$                                                                               | Experimental $\nu/\text{cm}^{-1}$                                                                                                   |
|---------------------------|----------------------------------------------------------------------------------------------------------------|-------------------------------------------------------------------------------------------------------------------------------------|
| <b>L</b>                  | 352,402,492,585,785,862,948,1026,<br>1098,1142,1202,1250,1300,1364,<br>1544,1625,1685,3052,3102,3225,<br>3650. | 456, 478, 584, 746, 829, 855, 962, 1021,<br>1091,1135,1153,1245,1289,1320,1337,<br>1354,1489,1542,1589,1612,2841,2945,<br>3036.     |
| <b>L+ Al<sup>3+</sup></b> | 410,584,608,698,742,785,962,1112,<br>1201,1284,1402,1450,1524,1612,<br>2024,3242,3648,3801                     | 458,478,517,584,748,778,969,1021,<br>1092,1171,1110,1136,1190,1209,<br>1246,1290,1321,1246,1355,1384,<br>1589, 1560,1619,2842,3128. |

#### General method of UV-Vis and fluorescence titration

Path length of the cells used for absorption and emission studies was 1 cm. For UV-Vis and fluorescence titrations, stock solution of **L** (10  $\mu\text{M}$ ) was prepared in methanol water (2:8, v/v). Working solutions were prepared from their respective stock solutions. Fluorescence measurements were performed using 5 nm  $\times$  5 nm slit width.

## Calculation of Quantum Yield

Fluorescence quantum yields ( $\Phi$ ) were estimated by integrating the area under the fluorescence curves using the equation<sup>1</sup>,

Where, **A** was the area under the fluorescence spectral curve, **OD** was optical density of the compound at the excitation wavelength and  $n$  was the refractive indices<sup>2</sup> of the solvent. Anthracene was used as quantum yield standard (quantum yield is 0.27 in ethanol)<sup>3</sup> for measuring the quantum yields at 330 nm.

## References

1. E. Austin and M. Gouterman, *Bioinorg. Chem.*, 1978, 9, 281.
2. F. I. El - Dossoki, *J. Chin. Chem. Soc.* 2007, 54, 1129.
3. W. H. Melhuish, *J. Phys. Chem.*, 1961, 65, 229.
